# Supplementary material
Source: publisher site journal article supplement (https://www.dovepress.com/article/384906)
Supplement: Supplementary file 1 [file get_supplementary_file.php]

**Supplementary Information**

**
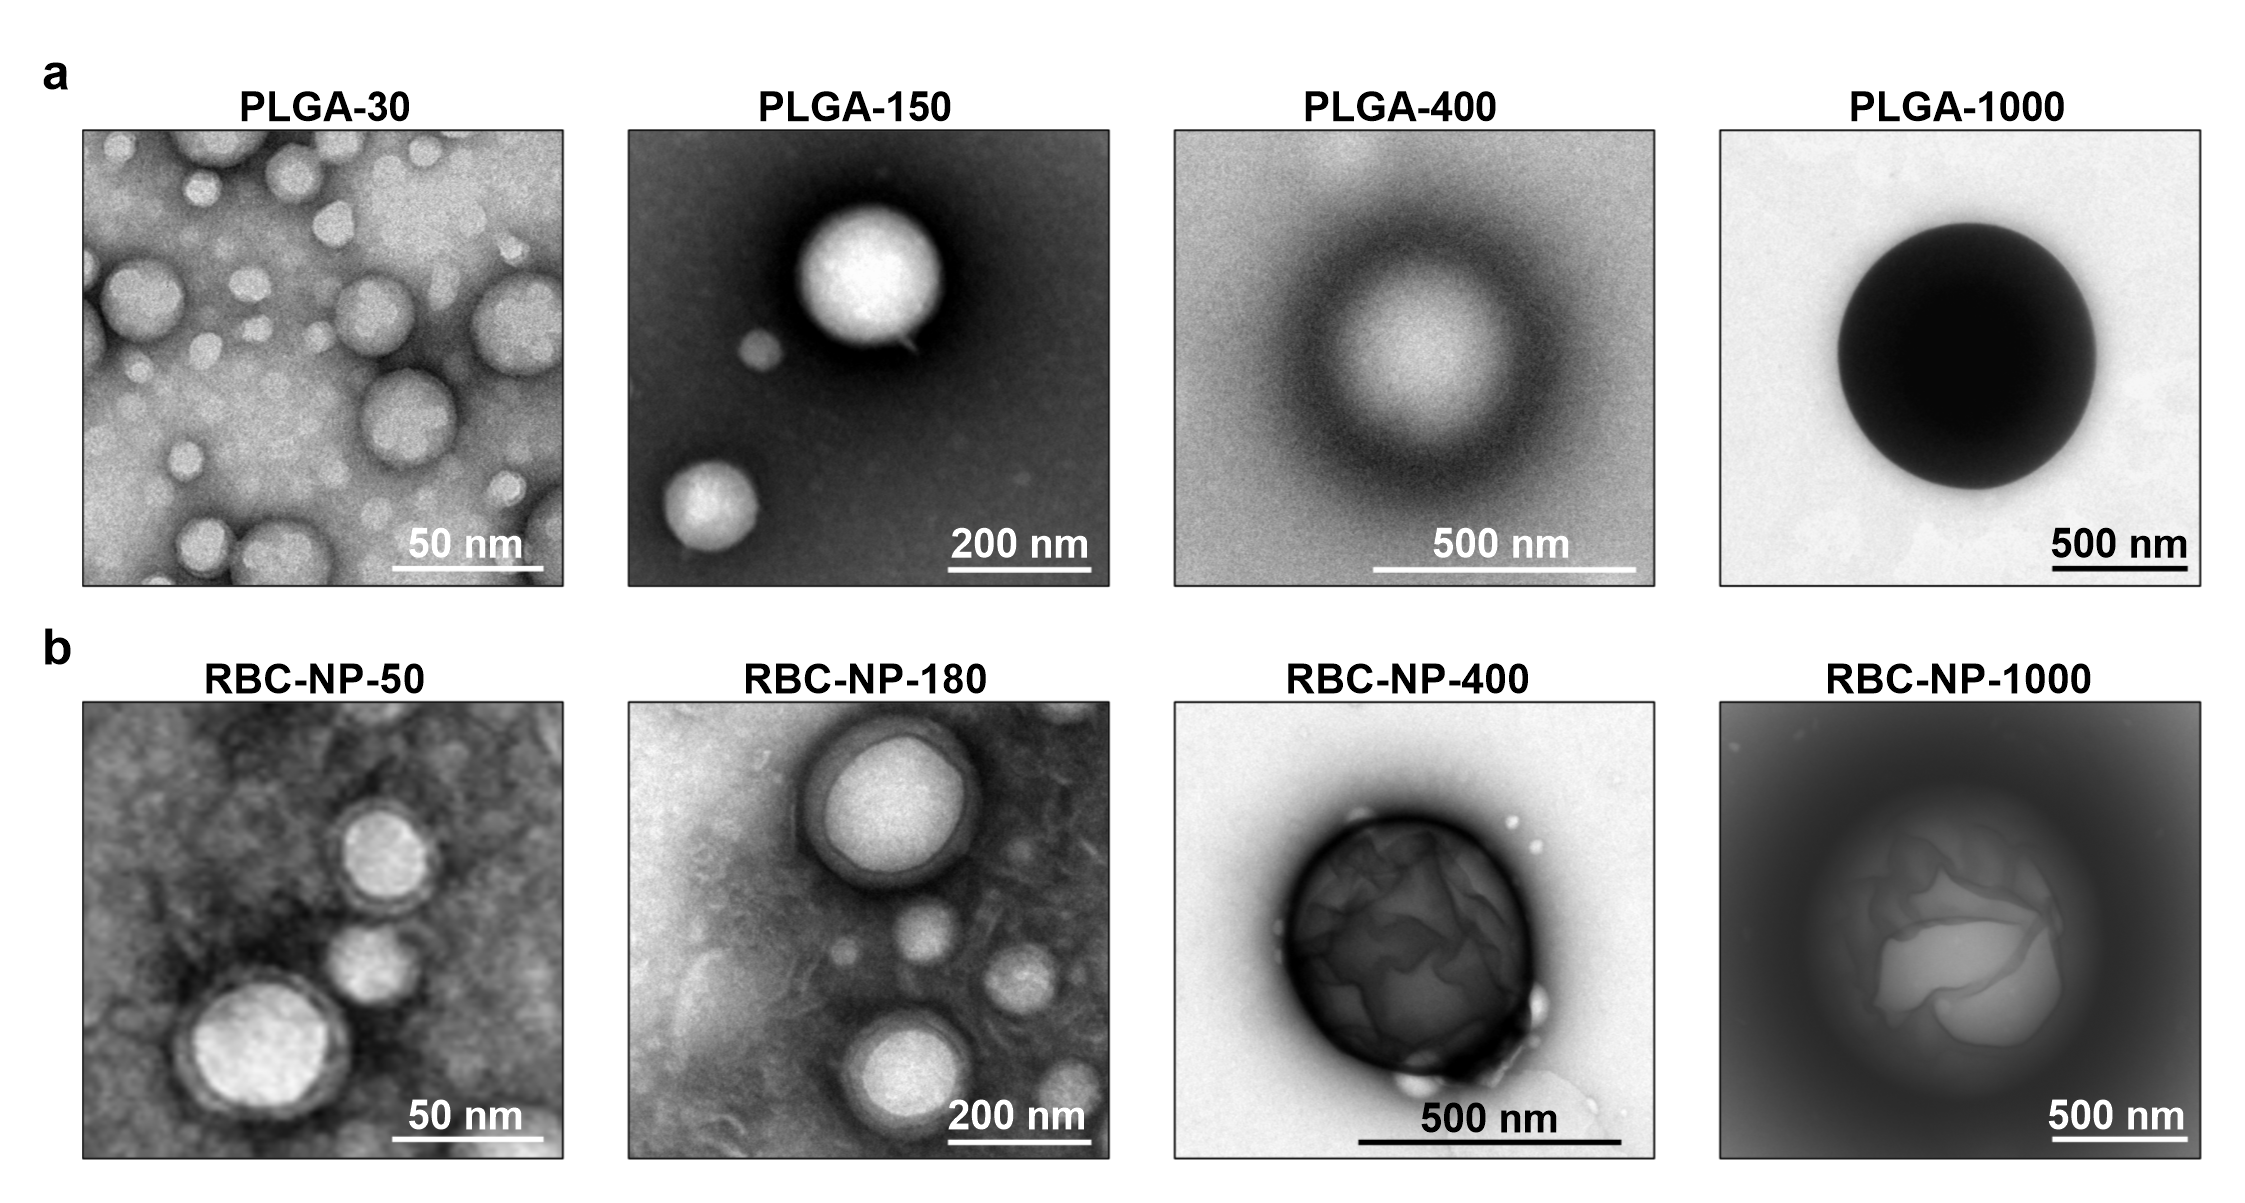
**

**Supplementary Figure 1**. (**a**) TEM images of different PLGA cores including 30, 150, 400, and 1000 nm. The scale bars were denoted in the corresponding images. (**b**) TEM images of different RBC-NPs including 50, 180, 400, and 1000 nm. The scale bars were denoted in the corresponding images.

To fluorescently label PLGA core, DiD dissolved in acetone was premixed with PLGA at a 2 wt% ratio prior to the synthesis of different PLGA particles (plsease find the details in ‘*Preparation and characterization of different-sized RBC-NP*’ in the part of ‘**Material and methods**’ in the main text). After systhesis of four sized DiD-labelling RBC-NP including 50, 180, 400, and 1000 nm, equivalent concentration of all four RBC-NP at 0.1 mg/mL (cell membrane protein) in 100 μL was used for subsequent measurement. Flourescence intensity was quantified at an excitation/emission of 630/670 nm using a plate reader.


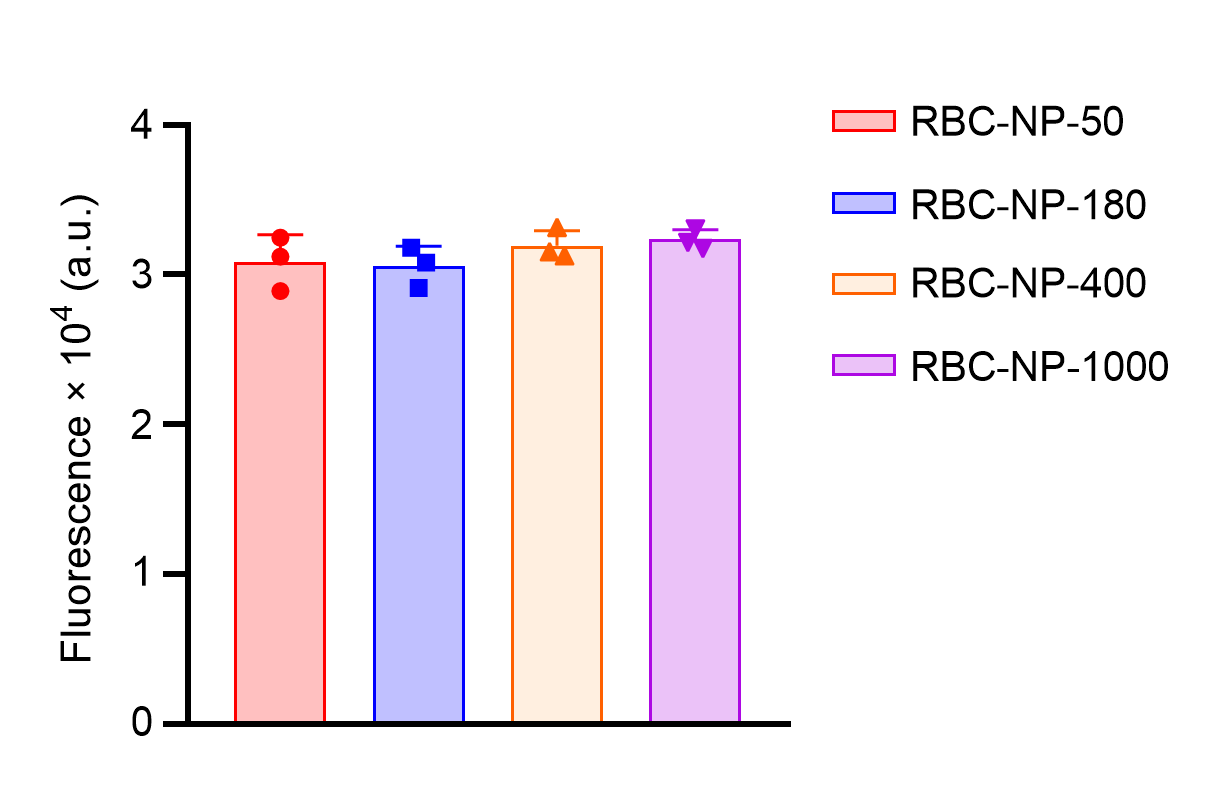


**Supplementary Figure 2.** DiD dye loading content in four sized RBC-NP after synthesis, including 50, 180, 400, and 1000 nm. n = 3, mean ± sd.

**
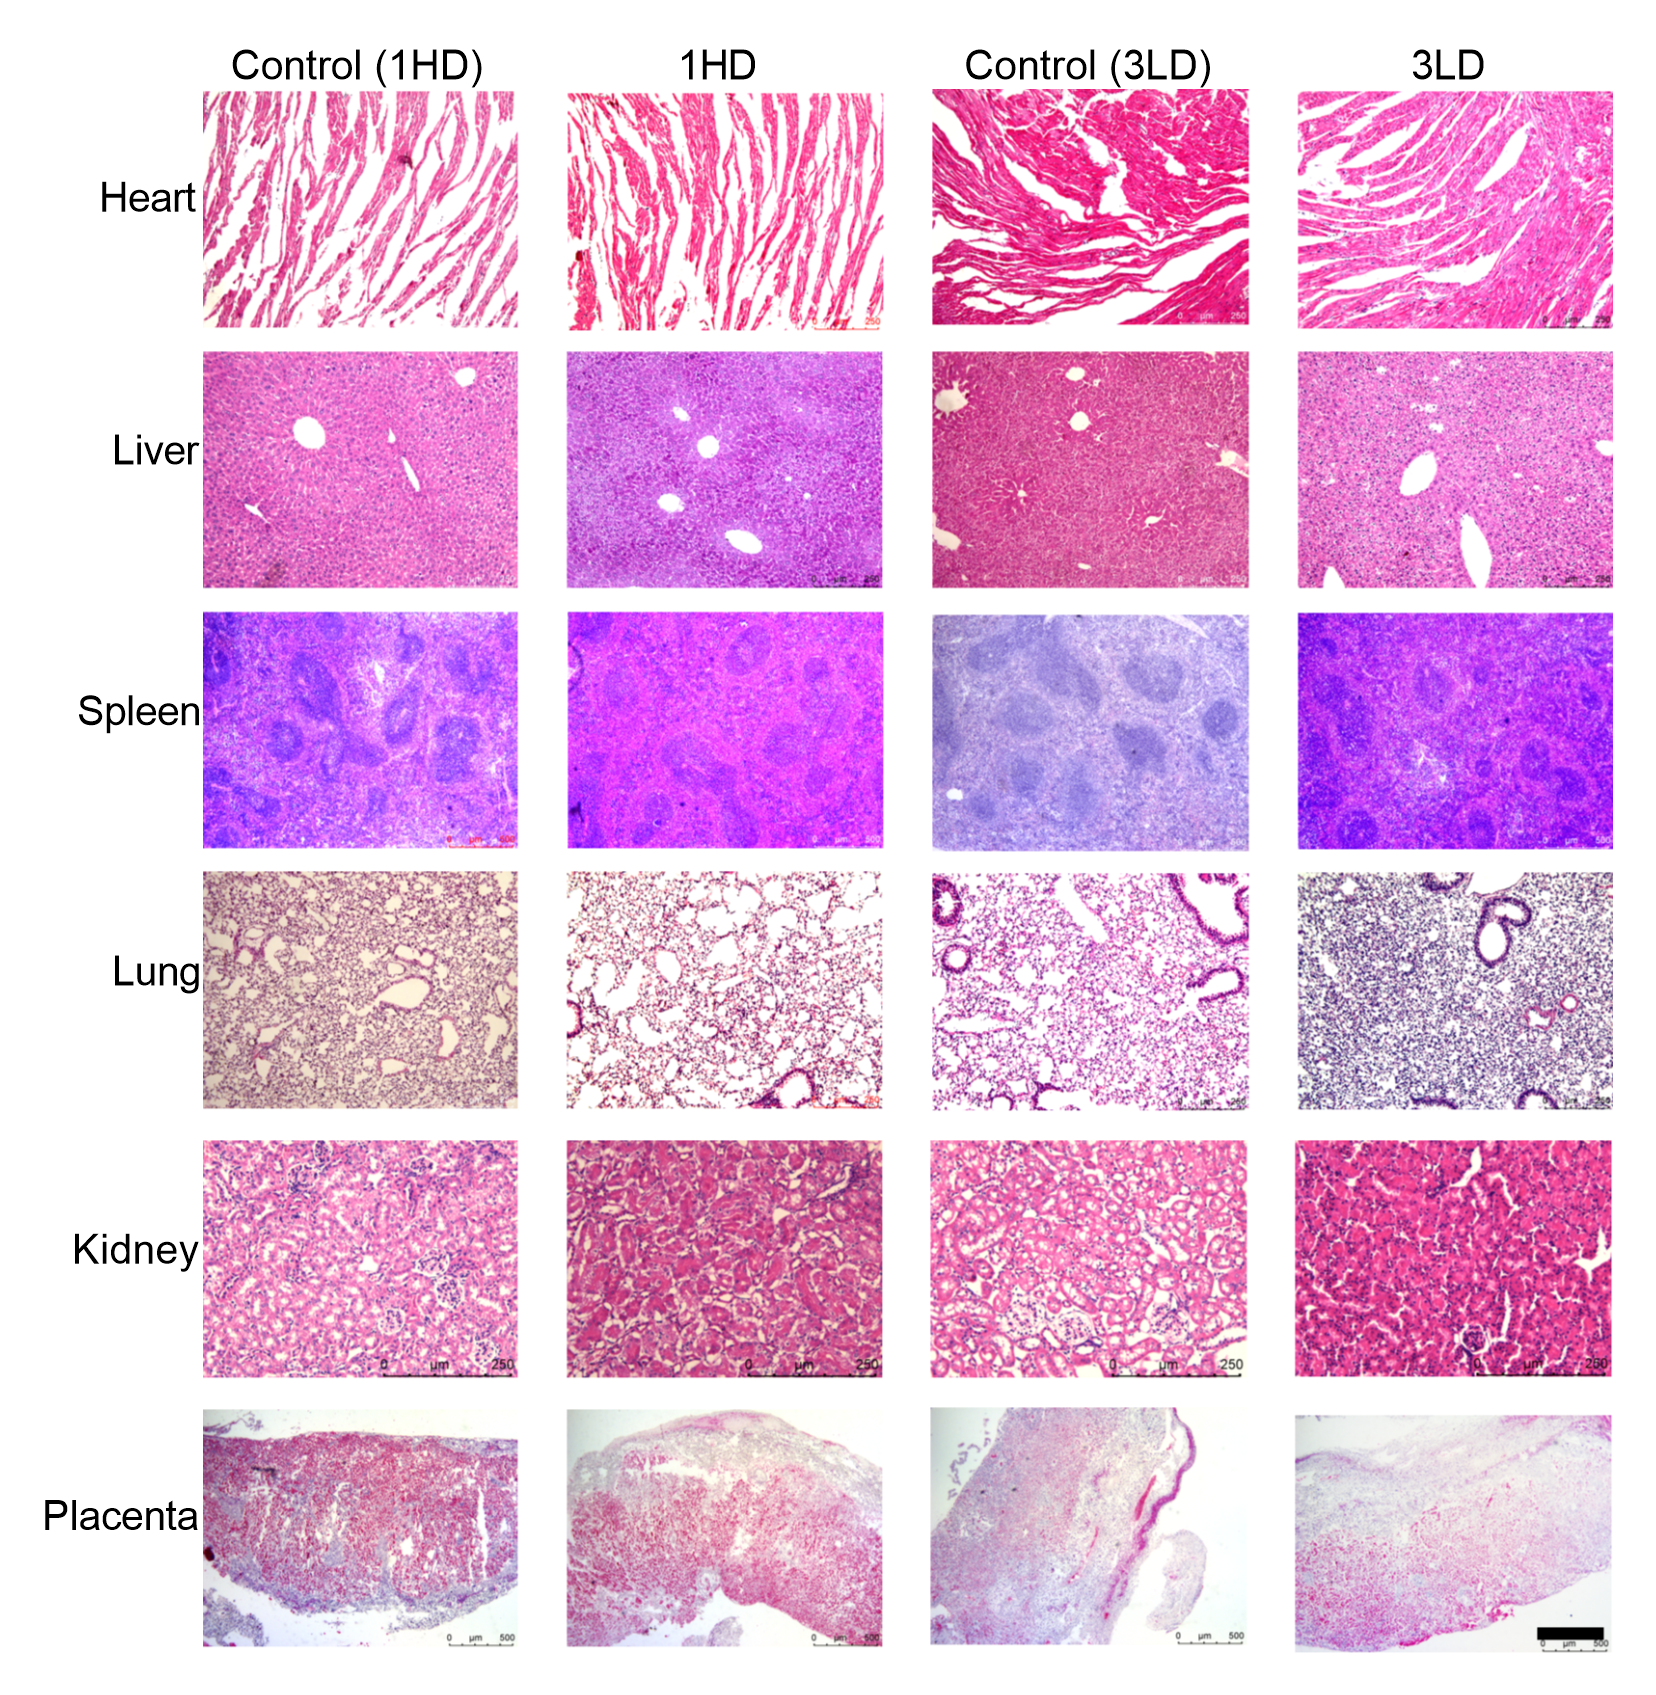
**

**Supplementary Figure 3**. HE staining images of the major organs including heart, liver, spleen, lungs, kidneys, and placentas were collected on 48 h after being treated by 1HD or 3LD of RBC-NP-50 by i.v. injections. Scale bar in HE images of spleen and placenta is expressed as 500 μm, whereas it indicates 250 μm in images of other tissues including heart, liver, lung, and kidney..


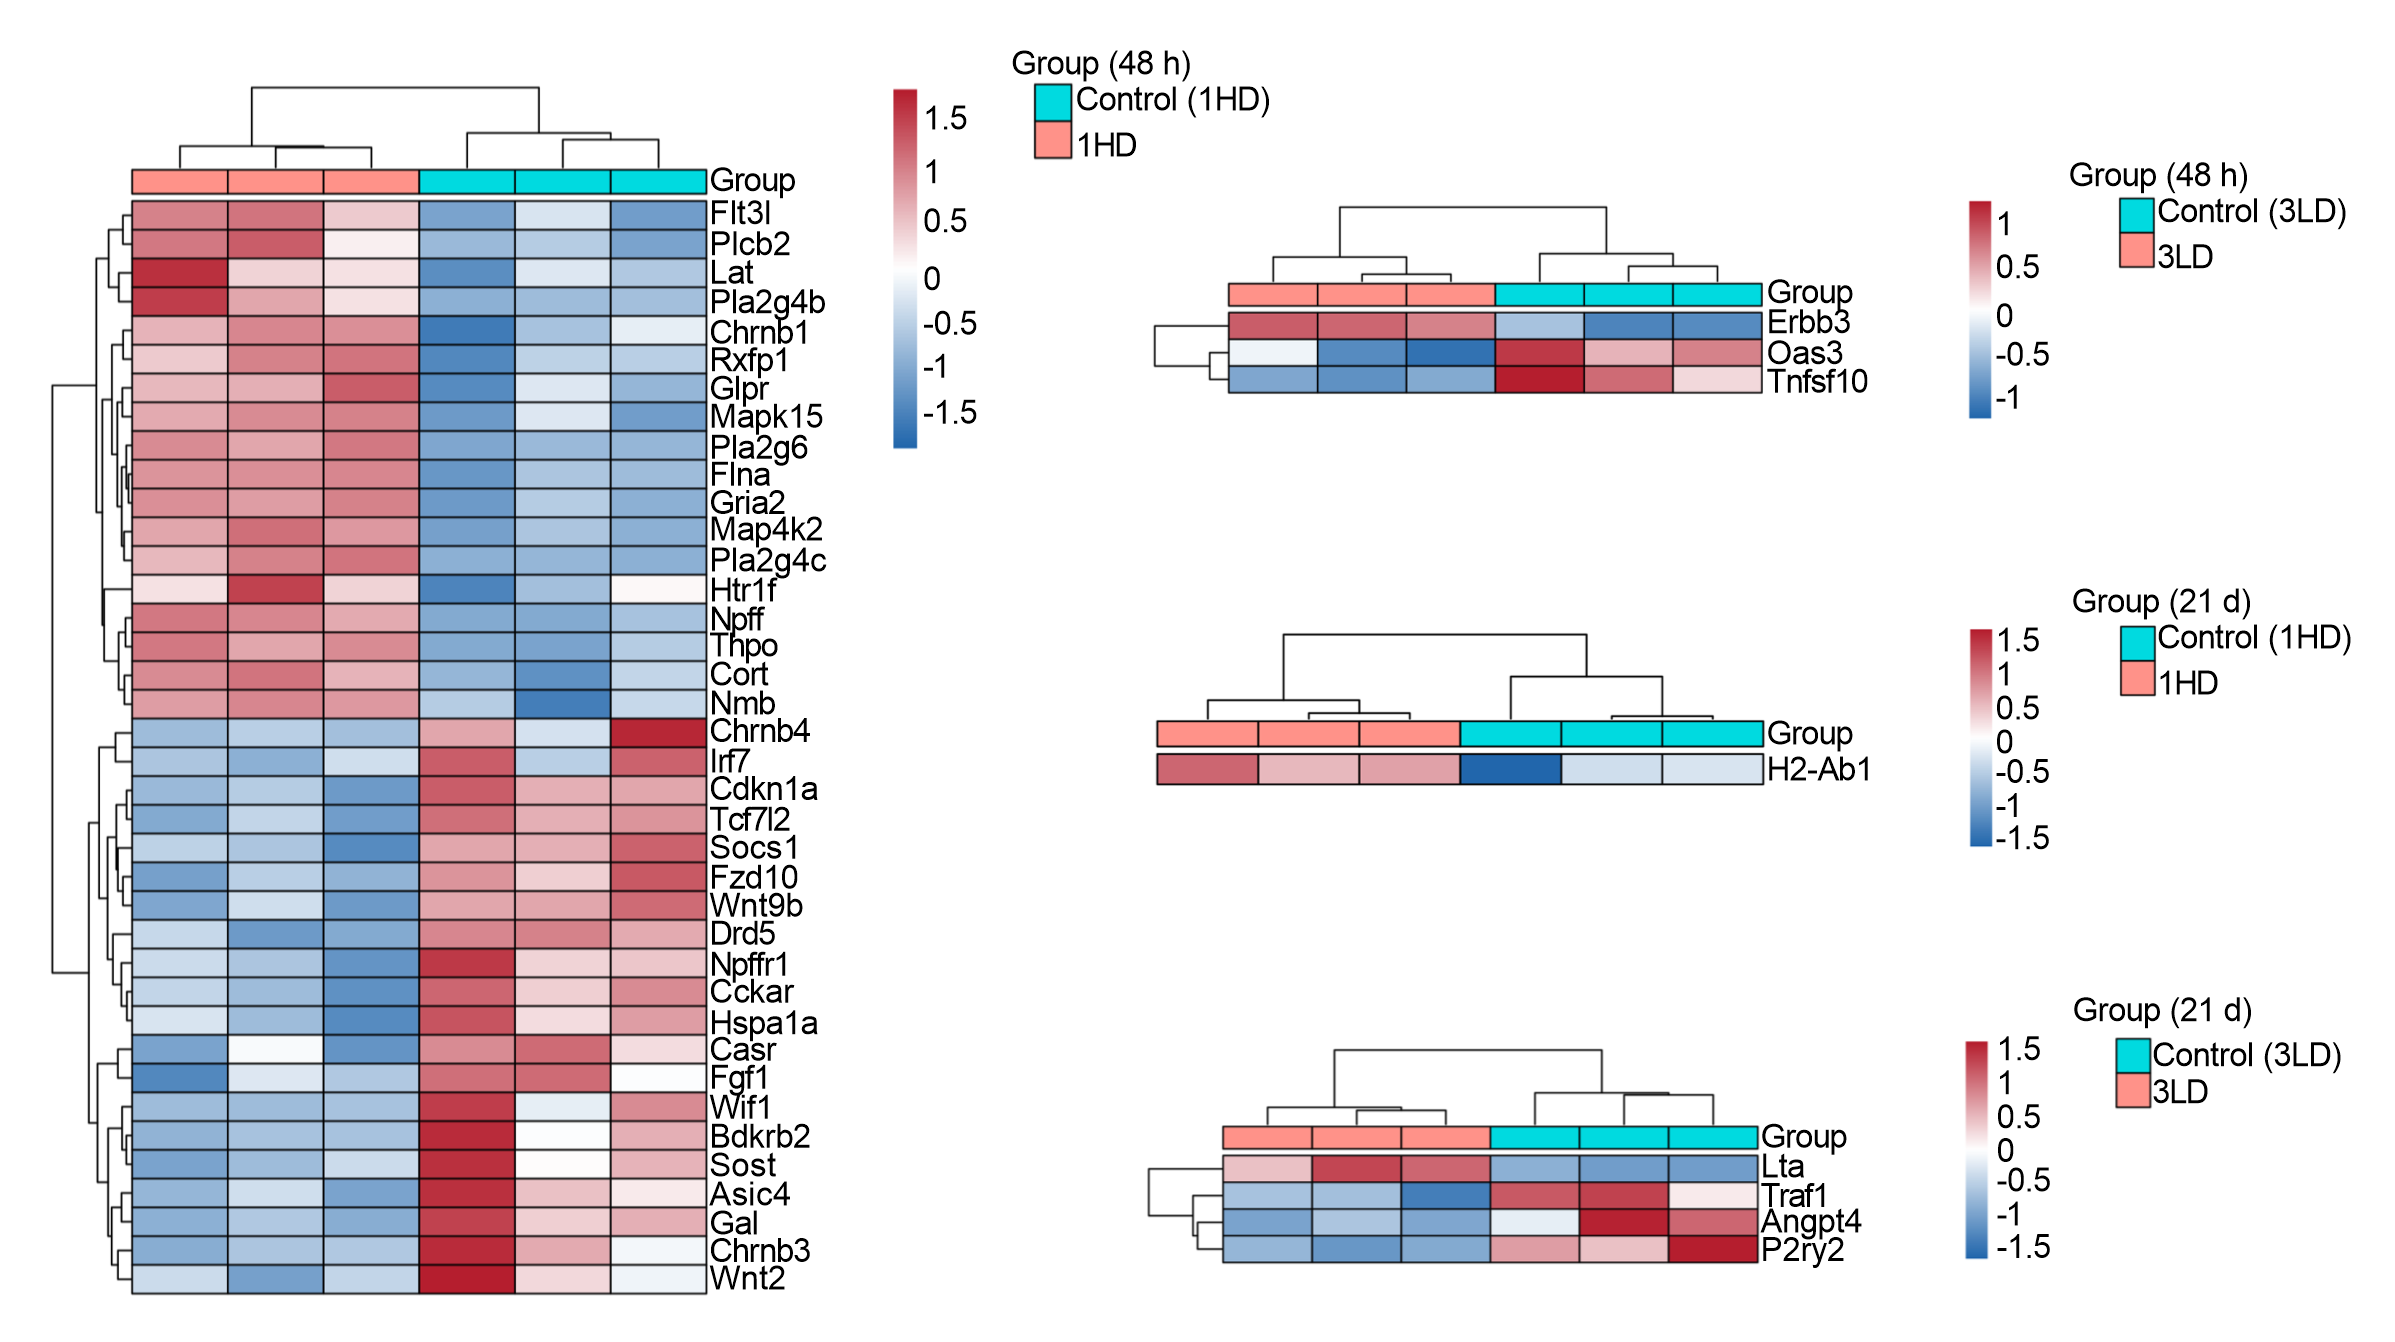


**Supplementary Figure 4**. Fetal brains at 48 h after treatment of 1HD or 3LD of RBC-NP-50 or brains of juvenile mice at 21 d post-birth after treated 1HD or 3LD of RBC-NP-50, were analyzed by high throughput mRNA sequencing. All dosing regimens were achieved by intravenous injection. Hot colors indicate upregulated genes, whereas cold colors represent downregulated genes. n = 3.

**Supplementary Table 1**. Weight ratios of PLGA to RBC membrane protein for making different sizes of RBC-NP particles

VPLGA: Volume of single PLGA particle (μm3) = ; *r* = radius of PLGA particle

MPLGA: Mass of single PLGA particle (μg) = VPLGA × *ρ*; *ρ* = density of PLGA

NPLGA: Numbers of PLGA particle in 1 mg of PLGA = 1 mg/MPLGA

| **Radius of RBC-NP (nm)** | **Surface area of single RBC-NP (μm2)** | **Total surface area of RBC-NP when completely coated onto 1 mg of PLGA particle (μm2)** | **Number of needed RBCs** | **Total RBC membrane protein should be added (mg) to 1 mg of PLGA particle** |
| --- | --- | --- | --- | --- |
| **25** | **0.00785** | **4.2735E+11** | **5.698E+9** | **3.13** |
| **90** | **0.101736** | **3.6508E+10** | **4.8678E+8** | **0.27** |
| **200** | **0.5024** | **1.3458E+10** | **1.7944E+8** | **0.0987** |
| **500** | **3.14** | **4.904E+9** | **6.5383E+7** | **0.0360** |

**Single RBC has 75 μm2 of surface area and 0. 55 pg of membrane protein**1.

1. Waugh, R. E. & Sarelius, I. H. Effects of lost surface area on red blood cells and red blood cell survival in mice. *Am. J. Physiol.* **271**, C1847-52 (1996).
